# Supplementary material
Source: PubMed Central journal article supplement (PMC3607486)

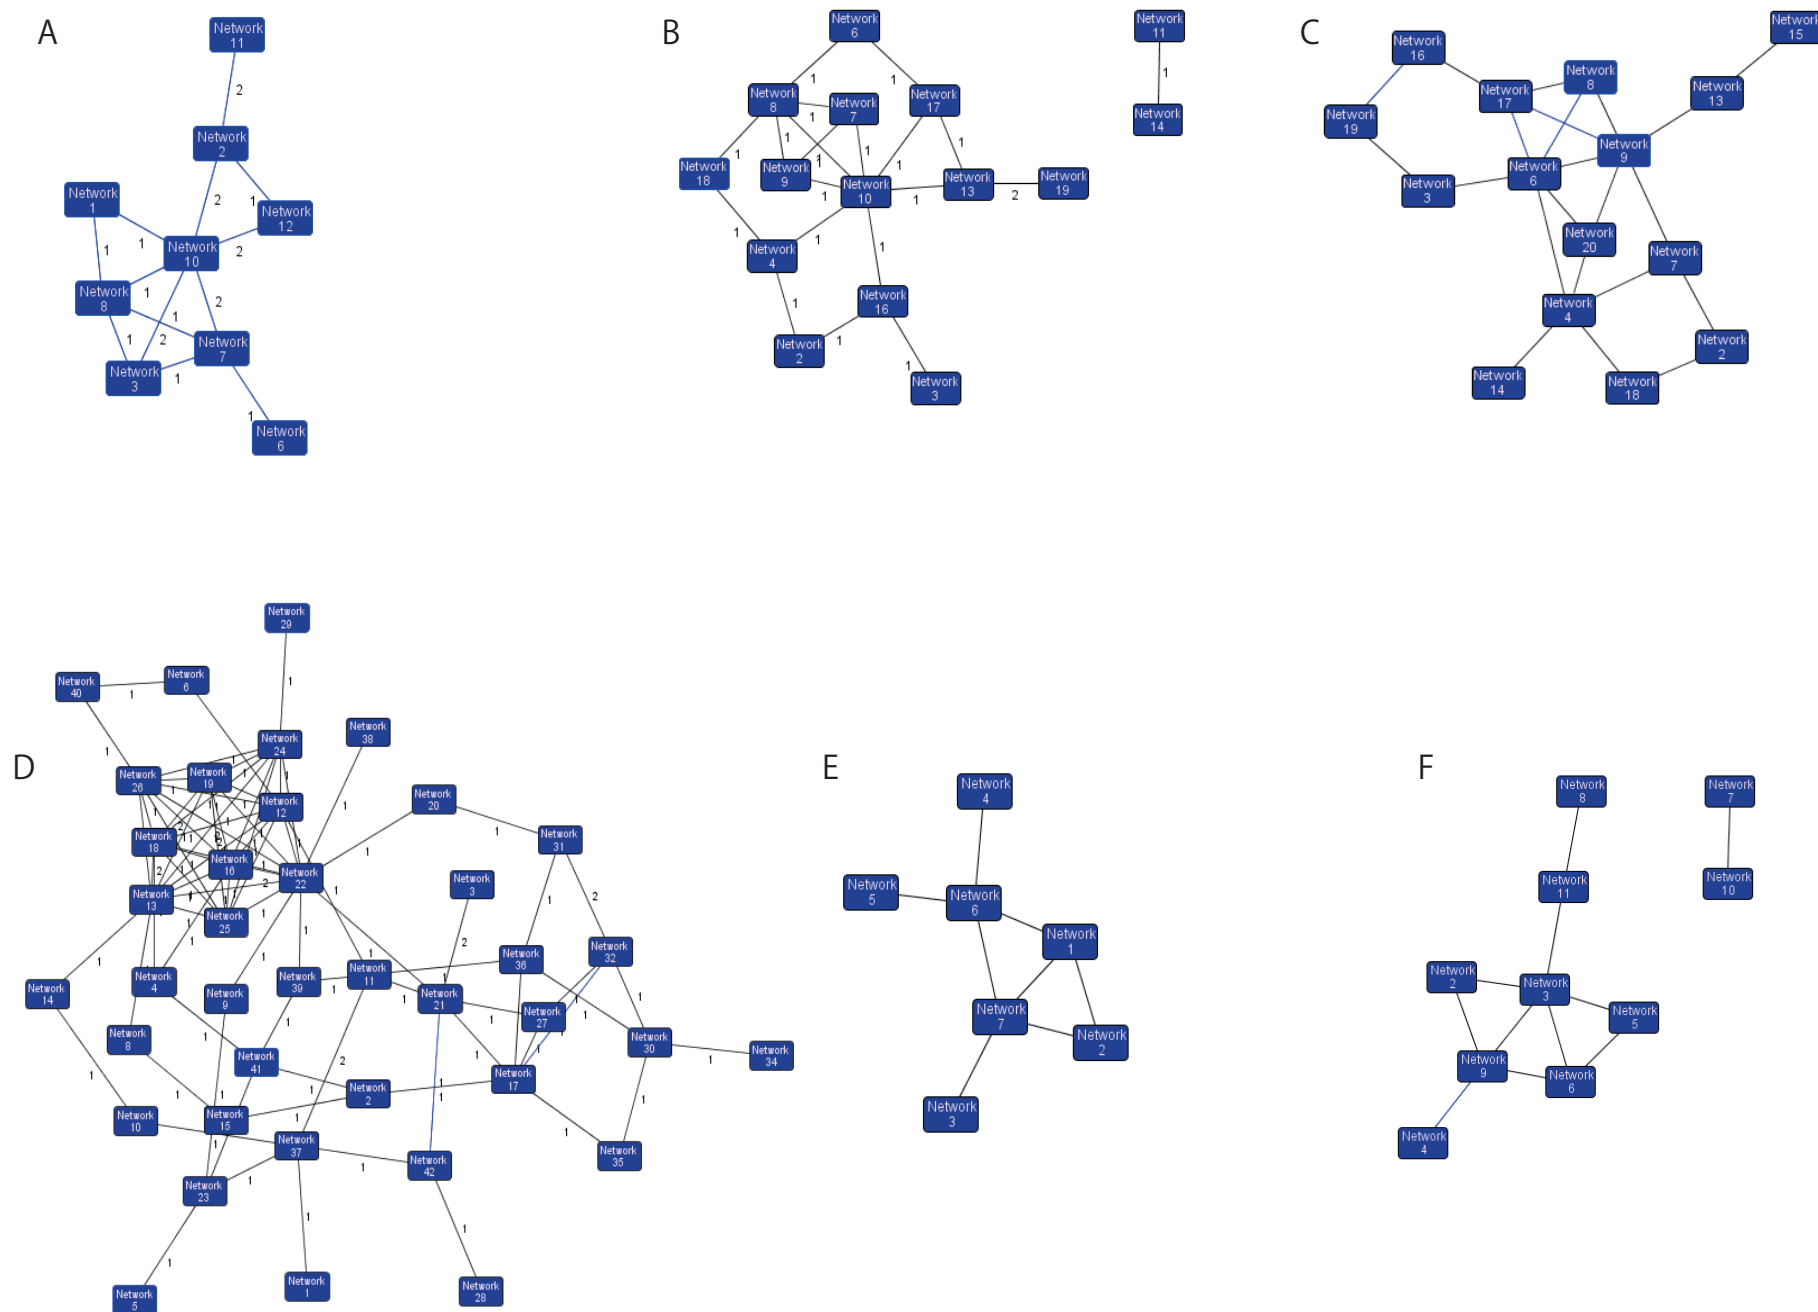

Supplementary Figure 1

Supplement: supp_REP-12-0435_120435_Feng_Cao_Supp_Fig1.pdf [file supp_REP-12-0435_120435_Feng_Cao_Supp_Fig1.pdf]

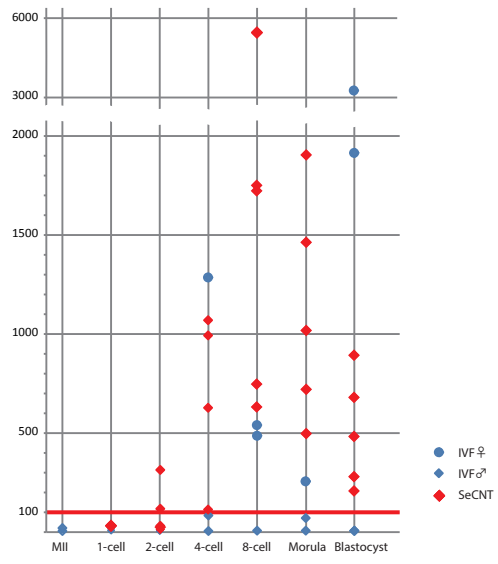

Supplementary Figure 2

Supplement: supp_REP-12-0435_120435_Feng_Cao_Supp_Fig2.pdf [file supp_REP-12-0435_120435_Feng_Cao_Supp_Fig2.pdf]

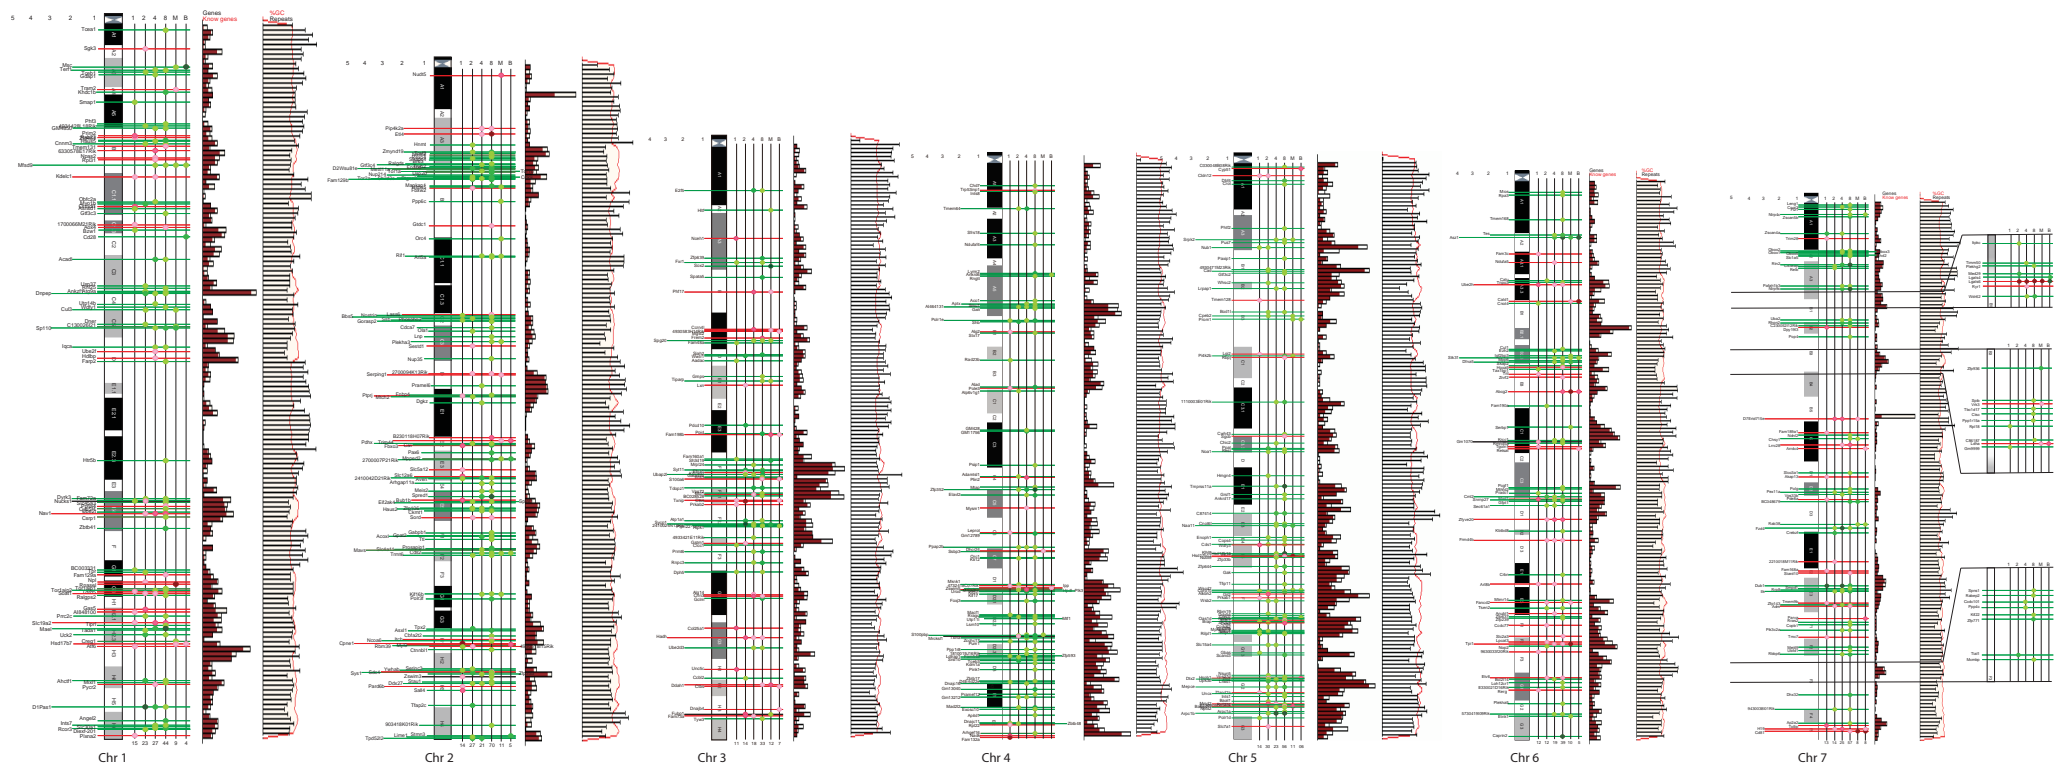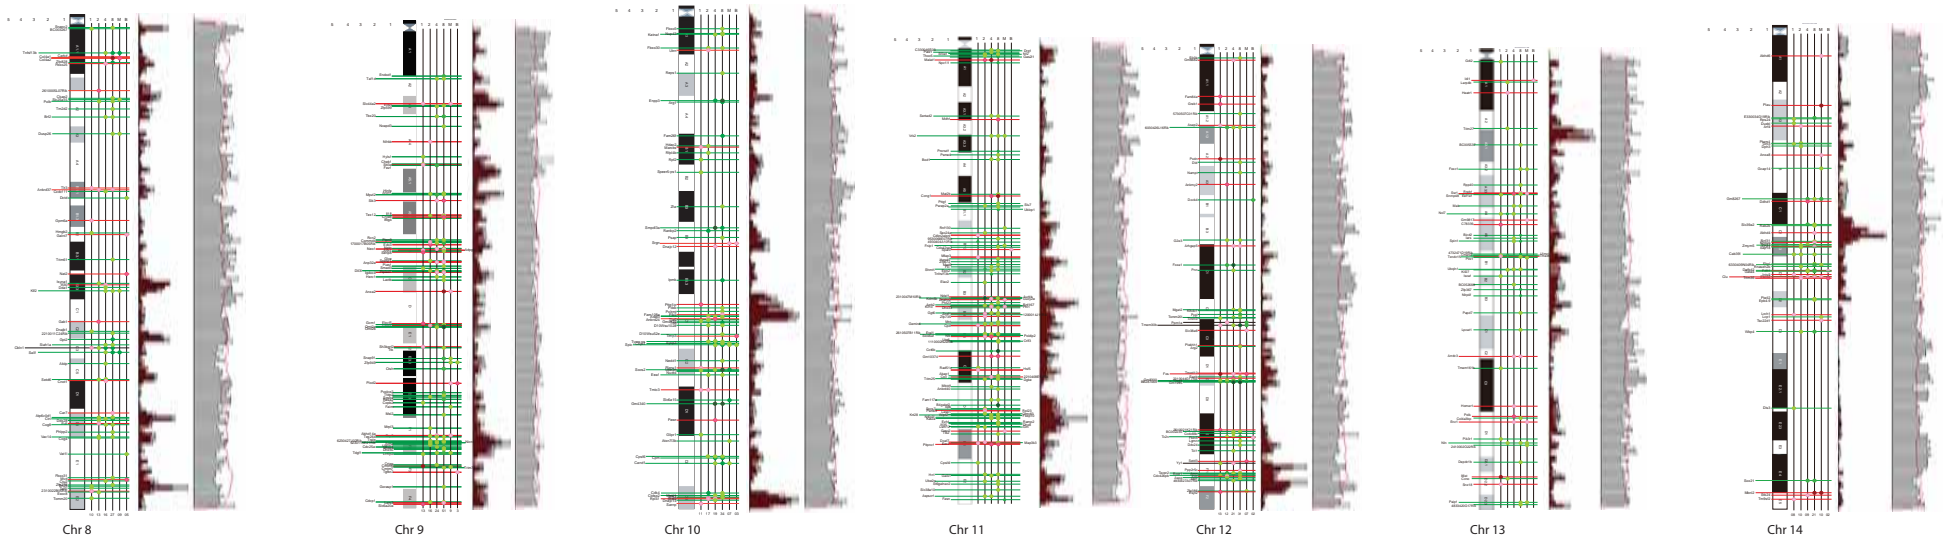

Supplementary Figure 3-1

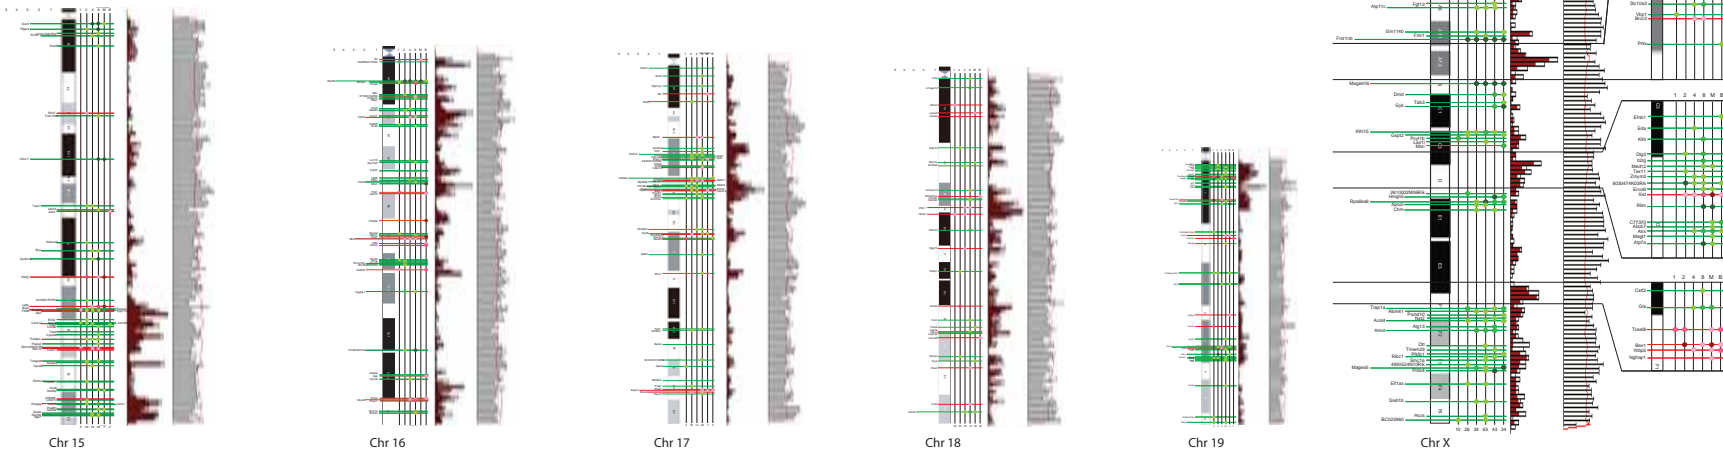

Supplementary Figure 3-2

Supplement: supp_REP-12-0435_120435_Feng_Cao_Supp_Fig3s.pdf [file supp_REP-12-0435_120435_Feng_Cao_Supp_Fig3s.pdf]

Develop rate (%)

Abnormally expressed genes (%)

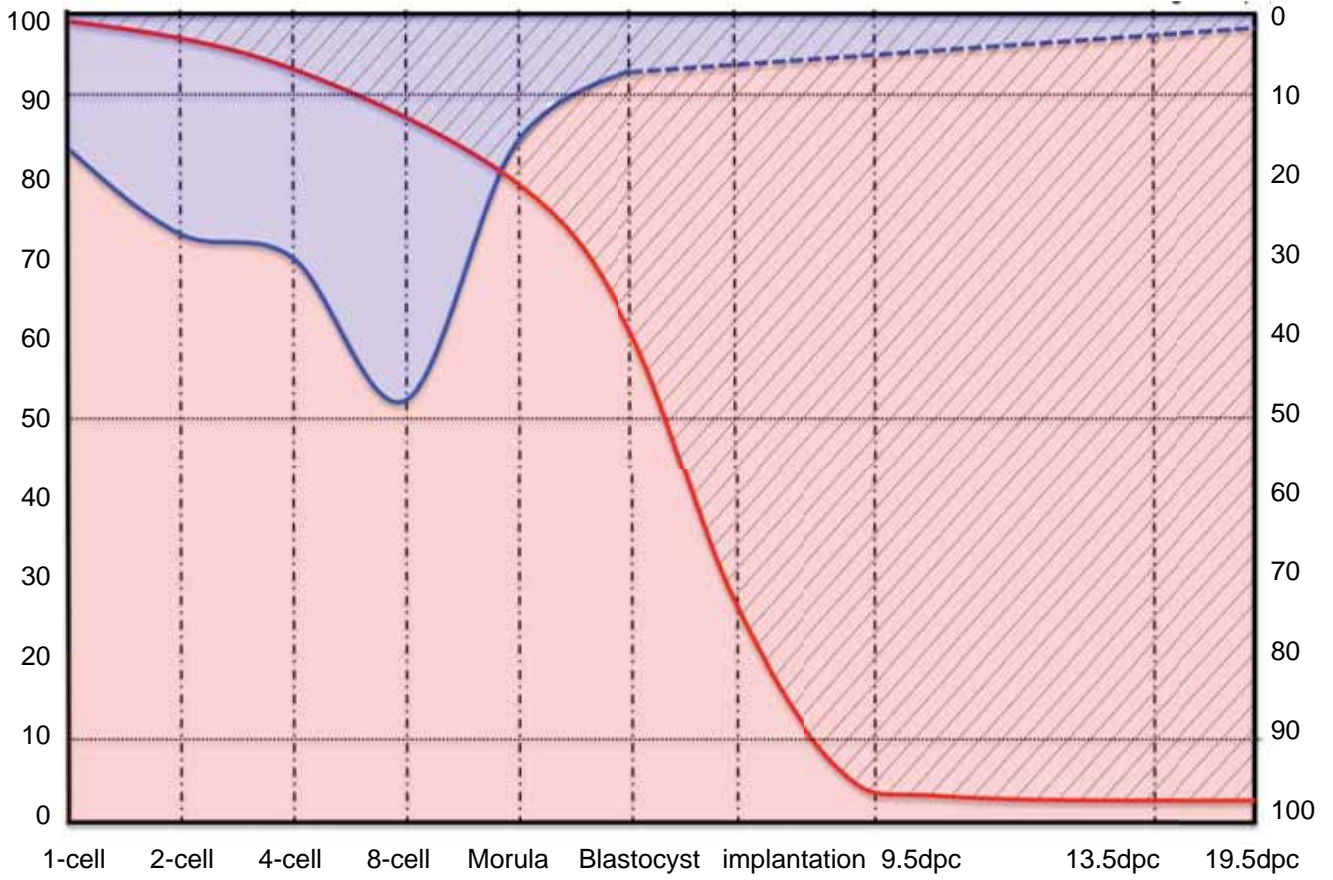

Supplementary Figure 4

Supplement: supp_REP-12-0435_120435_Feng_Cao_Supp_Fig4s.pdf [file supp_REP-12-0435_120435_Feng_Cao_Supp_Fig4s.pdf]

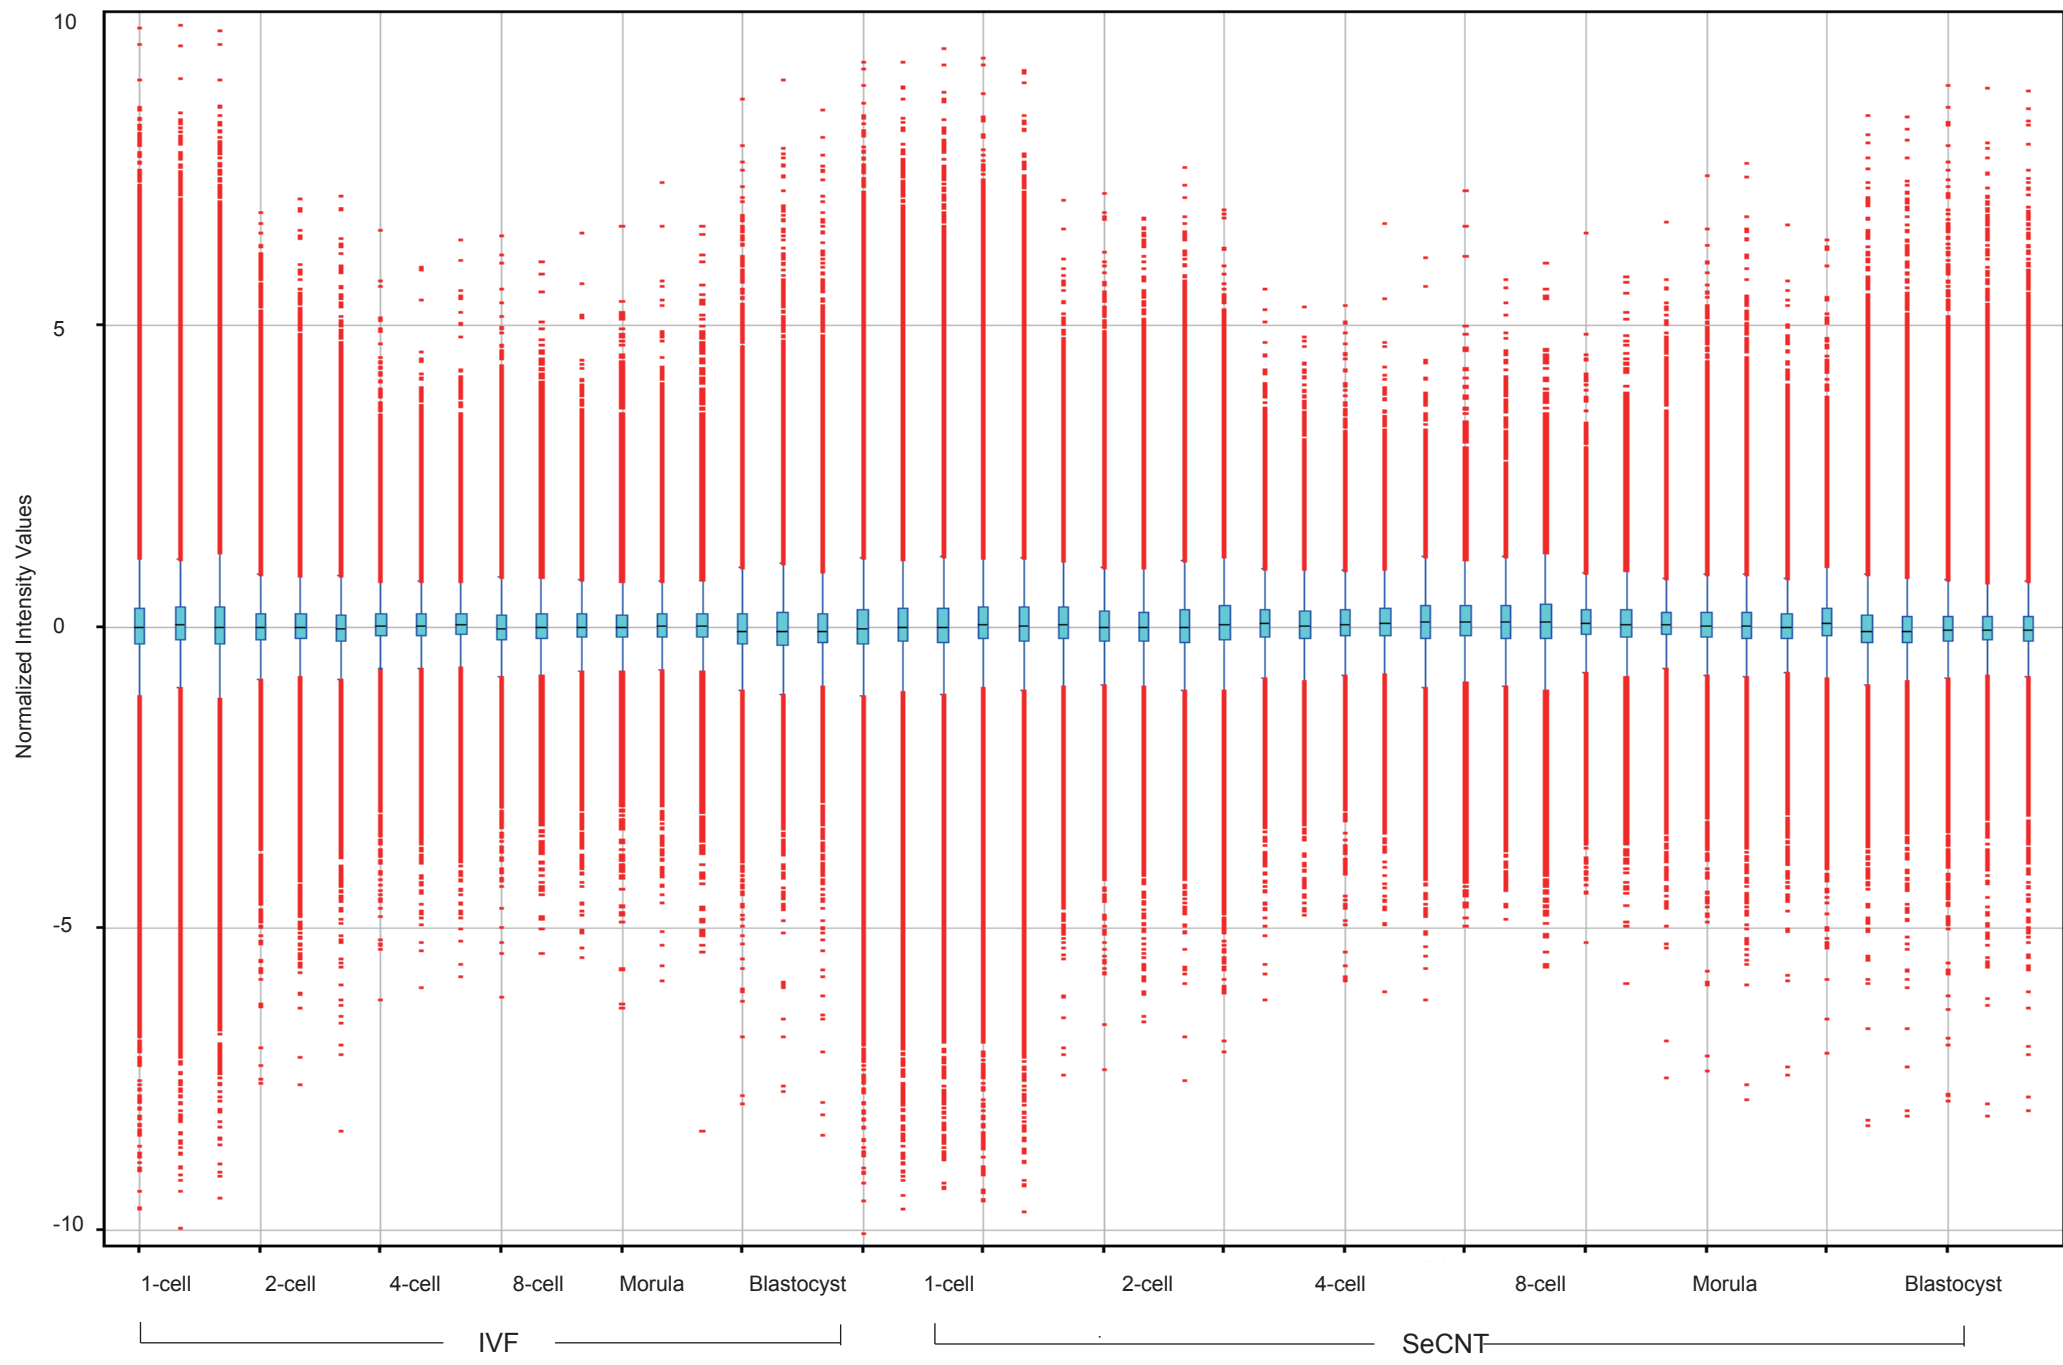

Supplementary Figure 5

Supplement: supp_REP-12-0435_120435_Feng_Cao_Supp_Fig5.pdf [file supp_REP-12-0435_120435_Feng_Cao_Supp_Fig5.pdf]
